# Supplementary material for: Identification of miR-215 mediated targets/pathways via translational immunoprecipitation expression analysis (TrIP-chip)
Source: PubMed Central journal article supplement (PMC4695198; doi:10.18632/oncotarget.4425), 2015-06-10
Supplement: oncotarget-06-24463-s001.pdf [file oncotarget-06-24463-s001.pdf]

# Identification of miR-215 mediated targets/pathways via translational immunoprecipitation expression analysis (TrIP-chip) approach

## Supplementary Material

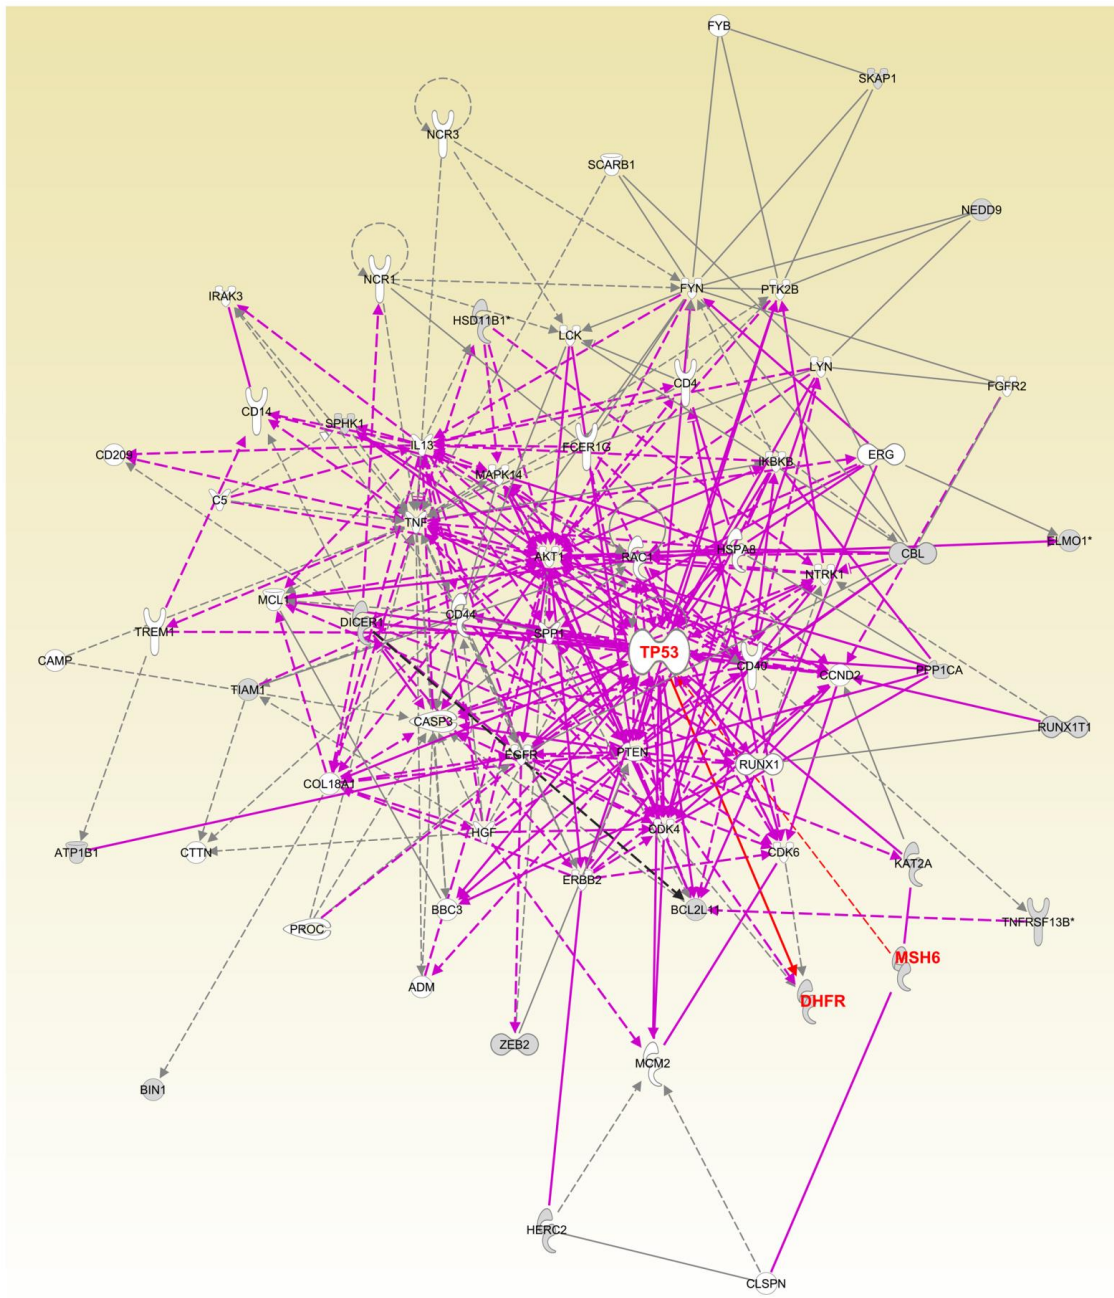

**Supplementary Figure 1:** Major target networks regulated by miR-215 determined by Ingenuity Pathway Analysis software.

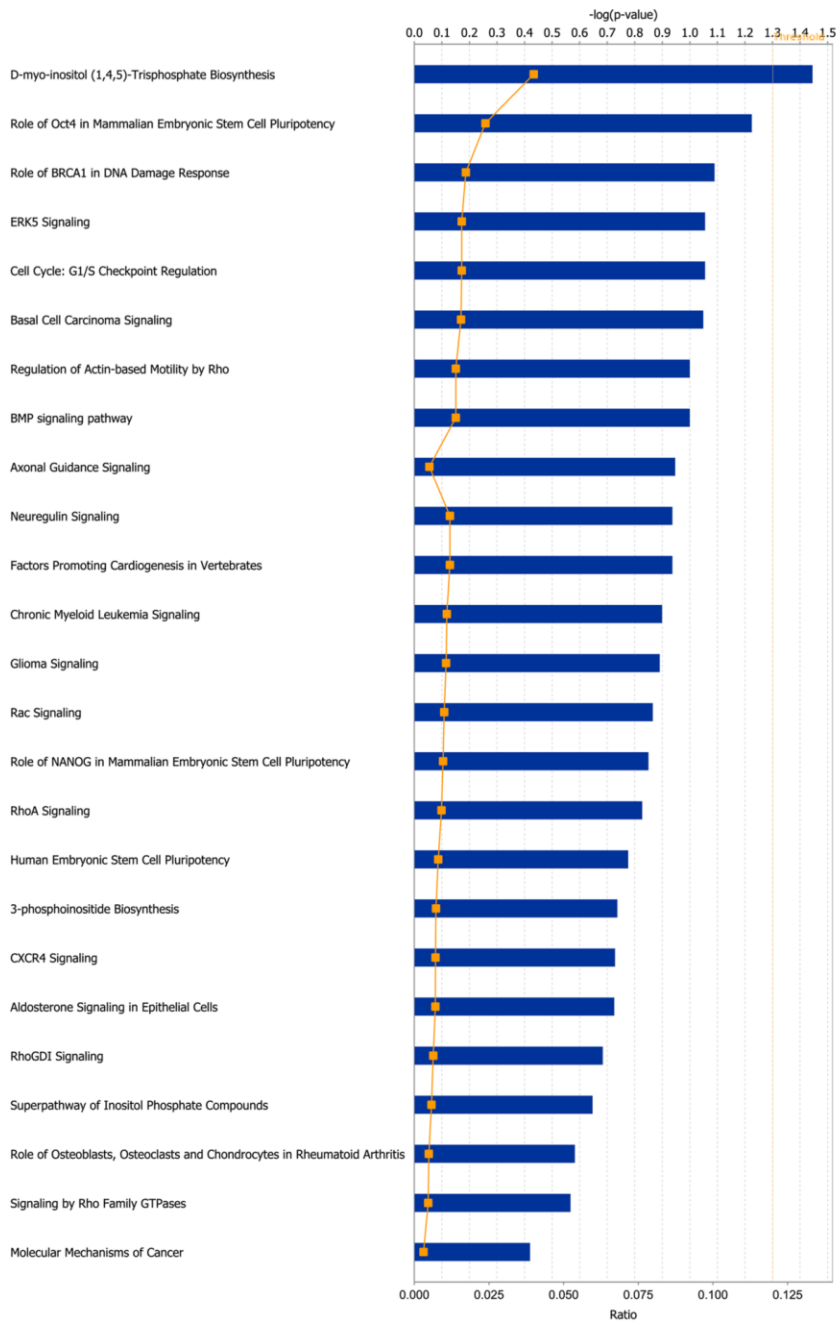

**Supplementary Figure 2:** Top major cellular pathways regulated by miR-215 determined by Gene Ontology analysis.

**Supplementary Table 1: miR-215 Targets Identified By TRIP and Non-Trip Approaches**

| <b>TRIP</b>   |                    | <b>Non-TRIP</b> |                    |
|---------------|--------------------|-----------------|--------------------|
| <b>Target</b> | <b>Fold Change</b> | <b>Target</b>   | <b>Fold Change</b> |
| FAM155A       | -130.94            | WNK             | -12.99             |
| LEKR1         | -114.15            | RNF4            | -12.68             |
| OR51V1        | -72.26             | TMTC3           | -5.27              |
| DMBT1         | -52.65             | FAM155A         | -4.82              |
| UGT2B28       | -50.65             | PAPPA2          | -4.1               |
| MMP16         | -50.21             | PRM3            | -3.43              |
| NELL1         | -49.07             | HSD11B1         | -3.41              |
| ZEB2          | -33.14             | FTHL17          | -3.19              |
| VPREB3        | -23.8              | AMER3           | -2.99              |
| SH2D6         | -23.56             | PHB             | -2.99              |
| OR8D2         | -20.6              | ELMO1           | -2.95              |
| WFDC13        | -18.74             | PDZD3           | -2.95              |
| KCNC3         | -18.06             | LRRC10B         | -2.95              |
| CARS2         | -17.1              | ARPP21          | -2.84              |
| CREB5         | -14.91             | KATNAL2         | -2.78              |
| BCAT1         | -14.76             | RUNX1T1         | -2.68              |
| CIB2          | -14.51             | OSBPL6          | -2.68              |
| TCL6          | -14.34             | C12orf63        | -2.51              |
| LOXL2         | -13.33             | LPHN3           | -2.37              |
| TRMT61A       | -13.25             | SRRM4           | -2.37              |
| CUX1          | -12.05             | KRT72           | -2.34              |
| BIN1          | -12                | BMP15           | -2.02              |
| GUCY1A2       | -11.91             | ALG10B          | -1.82              |
| BMP1          | -11.25             | ANKRD44         | -1.75              |
| KAT2A         | -10.5              | PI4KA           | -1.66              |
| CGREF1        | -10.28             | RBL2            | -1.54              |
| PI4KA         | -10.26             |                 |                    |
| CCDC171       | -10.21             |                 |                    |
| OR4S1         | -10.1              |                 |                    |
| PCNXL2        | -10.1              |                 |                    |
| OR2L2         | -9.98              |                 |                    |
| NEDD9         | -9.54              |                 |                    |
| SH3D21        | -9.43              |                 |                    |
| MTMR12        | -9.07              |                 |                    |
| HSD11B1       | -8.77              |                 |                    |
| RNF6          | -8.68              |                 |                    |
| TRAIP         | -8.19              |                 |                    |
| ELMO1         | -8.18              |                 |                    |

|           |       |  |  |
|-----------|-------|--|--|
| SLC26A2   | -7.81 |  |  |
| DLGAP4    | -7.78 |  |  |
| SEC13     | -7.67 |  |  |
| SLITRK4   | -7.6  |  |  |
| GNG3      | -7.46 |  |  |
| ACVR2B    | -7.36 |  |  |
| SPHK1     | -7.31 |  |  |
| SLC17A3   | -6.96 |  |  |
| RUNX1T1   | -6.96 |  |  |
| ZSCAN20   | -6.86 |  |  |
| ZNF135    | -6.73 |  |  |
| VSX1      | -6.44 |  |  |
| PDE2A     | -6.27 |  |  |
| WNK1      | -6.03 |  |  |
| TIAM1     | -5.91 |  |  |
| ATG16L2   | -5.81 |  |  |
| MLL3      | -5.64 |  |  |
| HERC2     | -5.53 |  |  |
| UPF3B     | -5.51 |  |  |
| PPP2CB    | -5.49 |  |  |
| MED14     | -5.46 |  |  |
| MSRB2     | -5.25 |  |  |
| STK32A    | -5.21 |  |  |
| ERCC3     | -5.11 |  |  |
| NA        | -5.09 |  |  |
| KCNG1     | -5.08 |  |  |
| PCIF1     | -5.07 |  |  |
| KRT35     | -4.85 |  |  |
| FAM134A   | -4.72 |  |  |
| KCNIP2    | -4.7  |  |  |
| TNFRSF13B | -4.65 |  |  |
| H3F3B     | -4.45 |  |  |
| ASXL2     | -4.2  |  |  |
| MED28     | -4.2  |  |  |
| KPNA6     | -3.94 |  |  |
| SYT15     | -3.88 |  |  |
| DICER1    | -3.87 |  |  |
| CISD1     | -3.56 |  |  |
| DDX50     | -3.54 |  |  |
| DHFR      | -3.49 |  |  |
| TECPR1    | -3.48 |  |  |
| FOXN1     | -3.45 |  |  |

|          |       |  |  |
|----------|-------|--|--|
| AMER3    | -3.44 |  |  |
| JAGN1    | -3.14 |  |  |
| PIP4K2B  | -3.14 |  |  |
| PAPPA2   | -3.08 |  |  |
| MCTS1    | -3.03 |  |  |
| RNF141   | -2.99 |  |  |
| C21orf67 | -2.96 |  |  |
| GRHL1    | -2.95 |  |  |
| ATP1B1   | -2.94 |  |  |
| CPSF4    | -2.91 |  |  |
| MCM6     | -2.89 |  |  |
| CBL      | -2.87 |  |  |
| DTL      | -2.86 |  |  |
| PPP1CA   | -2.84 |  |  |
| TYMS     | -2.81 |  |  |
| APBB1    | -2.8  |  |  |
| DCAF4L2  | -2.8  |  |  |
| NOB1     | -2.77 |  |  |
| GABPB1   | -2.75 |  |  |
| ELOVL1   | -2.7  |  |  |
| COPA     | -2.68 |  |  |
| SLC2A8   | -2.61 |  |  |
| KIF1B    | -2.6  |  |  |
| FGD5     | -2.52 |  |  |
| SMARCA5  | -2.48 |  |  |
| FAM20A   | -2.47 |  |  |
| ODC1     | -2.42 |  |  |
| OLIG2    | -2.38 |  |  |
| TTC21B   | -2.29 |  |  |
| NOC4L    | -2.23 |  |  |
| MSH6     | -2.16 |  |  |
| SKAP1    | -2.11 |  |  |
| BCL2L11  | -2.11 |  |  |
| CDON     | -2.01 |  |  |
| DDX55    | -1.98 |  |  |
| SH3TC2   | -1.61 |  |  |
